# Supplementary material for: Exploring the molecular basis of resistance to Botrytis cinerea in chickpea genotypes through biochemical and morphological markers
Source: PeerJ journal article supplement (doi:10.7717/peerj.15560), 2023-06-20
Supplement: rawdatafiles.zip [file rawdatafiles.zip]

## Sheet: Sheet1
		Cat (240 nm)													cat									cat
															specific activity								2		2 3 2 4 2 0 0								day 1	day 3	day 5	day7				day 1	day 3	day 5	day7
Day 1			o.d1	o.d2	o.d1/3	o.d2/3	r1	r2	mean	s.d		r1	r2	protein	r1/pc	r2/pc	mean	sd							1	20.3046	16.9205	18.6125	2.39292		PBG 5	control	25.8037	21.9966	21.5736	10.9983		PBG 5	control	0.598229	1.19646	4.1876	2.39292
1	C. pinnatifedum	control	0.024	0.02	0.008	0.00666667	20.3046	16.9205	18.6125	2.39292		20.3046	16.9205	49	0.414379	0.345316	0.379847	0.048835							2	15.2284	16.9205	16.0744	1.19646			diseased	27.9188	35.533	32.9949	16.9205			diseased	3.58937	3.58937	1.19646	0
		diseased	0.018	0.02	0.006	0.00666667	15.2284	16.9205	16.0744	1.19646		15.2284	16.9205	48.3	0.315288	0.35032	0.332804	0.0247714							3	25.3807	26.2267	25.8037	0.598229		C.pinnatifidum	control	18.6125	20.7276	19.0355	13.1134		C. pinnatifedum	control	2.39292	0.598229	0.598229	0.598229
																									4	25.3807	30.4568	27.9188	3.58937		C.pinnatifidum	diseased	16.0744	31.7259	32.1489	29.6108			diseased	1.19646	0.598229	1.19646	1.19646
2	PBG 5	control	0.03	0.031	0.01	0.0103333	25.3807	26.2267	25.8037	0.598229		25.3807	26.2267	54	0.470013	0.48568	0.477847	0.0110783							5	20.3046	21.1506	20.7276	0.598229
		diseased	0.03	0.036	0.01	0.012	25.3807	30.4568	27.9188	3.58937		25.3807	30.4568	45.65	0.555985	0.667182	0.611583	0.0786281							6	31.3029	32.1489	31.7259	0.598229
																									7	22.8426	21.1506	21.9966	1.19646
Day 3																									8	38.071	32.9949	35.533	3.58937
1	C. pinnatifedum	control	0.024	0.025	0.008	0.00833333	20.3046	21.1506	20.7276	0.598229		20.3046	21.1506	26.725	0.759759	0.791416	0.775587	0.0223846							9	18.6125	19.4585	19.0355	0.598229
		diseased	0.037	0.038	0.0123333	0.0126667	31.3029	32.1489	31.7259	0.598229		31.3029	32.1489	44.375	0.705417	0.724482	0.714949	0.0134812							10	31.3029	32.9949	32.1489	1.19646
																									11	32.1489	33.8409	32.9949	1.19646
2	PBG 5	control	0.027	0.025	0.009	0.00833333	22.8426	21.1506	21.9966	1.19646		22.8426	21.1506	60.375	0.378346	0.35032	0.364333	0.0198171							12	18.6125	24.5347	21.5736	4.1876
		diseased	0.045	0.039	0.015	0.013	38.071	32.9949	35.533	3.58937		38.071	32.9949	59.15	0.643636	0.557818	0.600727	0.0606826							13	12.6904	13.5364	13.1134	0.598229
																									14	30.4568	28.7648	29.6108	1.19646
Day 5																									15	9.30626	12.6904	10.9983	2.39292
1	C. pinnatifedum	control	0.022	0.023	0.00733333	0.00766667	18.6125	19.4585	19.0355	0.598229		18.6125	19.4585	40.65	0.457872	0.478685	0.468279	0.0147166							16	16.9205	16.9205	16.9205	0
		diseased	0.037	0.039	0.0123333	0.013	31.3029	32.9949	32.1489	1.19646		31.3029	32.9949	44.225	0.707809	0.746069	0.726939	0.0270539
2	PBG 5	control	0.038	0.04	0.0126667	0.0133333	32.1489	33.8409	32.9949	1.19646		32.1489	33.8409	59.3	0.54214	0.570673	0.556407	0.0201764
		diseased	0.022	0.029	0.00733333	0.00966667	18.6125	24.5347	21.5736	4.1876		18.6125	24.5347	62.625	0.297206	0.391771	0.344489	0.0668679
Day 7
1	C. pinnatifedum	control	0.015	0.016	0.005	0.00533333	12.6904	13.5364	13.1134	0.598229		12.6904	13.5364	38.325	0.331125	0.3532	0.342162	0.0156094
		diseased	0.036	0.034	0.012	0.0113333	30.4568	28.7648	29.6108	1.19646		30.4568	28.7648	39.9	0.763329	0.720922	0.742126	0.0299864
2	PBG 5	control	0.011	0.015	0.00366667	0.005	9.30626	12.6904	10.9983	2.39292		9.30626	12.6904	50.975	0.182565	0.248952	0.215759	0.0469429
		diseased	0.02	0.02	0.00666667	0.00666667	16.9205	16.9205	16.9205	0		16.9205	16.9205	63.475	0.266569	0.266569	0.266569	0
														0
		Apx (290 nm)
																								Apx									1	3	5	7				day 1	day 3	day 5	day 7
Day 1			o.d1	o.d2	o.d1/3	o.d2/3	r1	r2	mean	sd		r1	r2	protein	r1/pc	r2/pc	mean	sd					2		2 3 2 4 2 0 0						PBG 5	uninoculated	196.41	279.73	107.13	232.12		PBG 5	control	8.42	25.25	16.8	8.42
1	C. pinnatifedum	control	0.011	0.014	0.00366667	0.00466667	130.937	166.647	148.792	25.2508		130.937	166.647	49	2.67218	3.40095	3.03656	0.515322							1	0.130937	0.166647	0.148792	0.0252508		PBG 5	inoculated	244.02	303.54	142.84	220.21			diseased	42.1	8.42	50.5	42.1
		diseased	0.022	0.021	0.00733333	0.007	261.873	249.97	255.922	8.41693		261.873	249.97	48.3	5.42181	5.17536	5.29859	0.174264							2	0.261873	0.24997	0.255922	0.00841693		C.pinnatifidum	uninoculated	148.79	339.25	285.68	172.59		C. pinnatifedum	control	25.25	25.25	33.7	8.42
							0	0				0	0												3	0.202357	0.190453	0.196405	0.00841693		C.pinnatifidum	inoculated	255.92	190.45	517.79	416.62			diseased	8.42	33.7	8.42	50.5
2	PBG 5	control	0.017	0.016	0.00566667	0.00533333	202.357	190.453	196.405	8.41693		202.357	190.453	54	3.74735	3.52691	3.63713	0.155869							4	0.21426	0.273777	0.244018	0.0420846
		diseased	0.018	0.023	0.006	0.00766667	214.26	273.777	244.018	42.0846		214.26	273.777	45.65	4.69354	5.9973	5.34542	0.921898							5	0.32139	0.3571	0.339245	0.0252508
							0	0				0	0												6	0.166647	0.21426	0.190453	0.0336677
Day 3							0	0				0	0												7	0.297583	0.261873	0.279728	0.0252508
1	C. pinnatifedum	control	0.027	0.03	0.009	0.01	321.39	357.1	339.245	25.2508		321.39	357.1	26.725	12.0258	13.362	12.6939	0.944838							8	0.309487	0.297583	0.303535	0.00841693
		diseased	0.014	0.018	0.00466667	0.006	166.647	214.26	190.453	33.6677		166.647	214.26	44.375	3.75542	4.82839	4.29191	0.758709							9	0.261873	0.309487	0.28568	0.0336677
							0	0				0	0												10	0.511843	0.523747	0.517795	0.00841693
2	PBG 5	control	0.025	0.022	0.00833333	0.00733333	297.583	261.873	279.728	25.2508		297.583	261.873	60.375	4.92892	4.33745	4.63318	0.418232							11	0.119033	0.0952267	0.10713	0.0168339
		diseased	0.026	0.025	0.00866667	0.00833333	309.487	297.583	303.535	8.41693		309.487	297.583	59.15	5.23223	5.03099	5.13161	0.142298							12	0.17855	0.10713	0.14284	0.0505016
							0	0				0	0												13	0.166647	0.17855	0.172598	0.00841693
Day 5							0	0				0	0												14	0.21426	0.67849	0.446375	0.32826
1	C. pinnatifedum	control	0.022	0.026	0.00733333	0.00866667	261.873	309.487	285.68	33.6677		261.873	309.487	40.65	6.44215	7.61345	7.0278	0.828234							15	0.238067	0.226163	0.232115	0.00841693
		diseased	0.043	0.044	0.0143333	0.0146667	511.843	523.747	517.795	8.41693		511.843	523.747	44.225	11.5736	11.8428	11.7082	0.190321							16	0.190453	0.24997	0.220212	0.0420846
							0	0				0	0
2	PBG 5	control	0.01	0.008	0.00333333	0.00266667	119.033	95.2267	107.13	16.8339		119.033	95.2267	59.3	2.00731	1.60585	1.80658	0.283876
		diseased	0.015	0.009	0.005	0.003	178.55	107.13	142.84	50.5016		178.55	107.13	62.625	2.8511	1.71066	2.28088	0.806412
							0	0				0	0
Day 7							0	0				0	0
1	C. pinnatifedum	control	0.014	0.015	0.00466667	0.005	166.647	178.55	172.598	8.41693		166.647	178.55	38.325	4.34825	4.65884	4.50354	0.21962
		diseased	0.038	0.032	0.0126667	0.0106667	452.327	380.907	416.617	50.5016		452.327	380.907	39.9	11.3365	9.54653	10.4415	1.2657
							0	0				0	0
2	PBG 5	control	0.02	0.019	0.00666667	0.00633333	238.067	226.163	232.115	8.41693		238.067	226.163	50.975	4.67026	4.43675	4.55351	0.165119
		diseased	0.016	0.021	0.00533333	0.007	190.453	249.97	220.212	42.0846		190.453	249.97	63.475	3.00045	3.93809	3.46927	0.663011
		SOD(420nm)
																																SOD
Day 1			o.d1	o.d2	od/m 1	od/m 2	p/m	p/m -om1	p/m-om 2	x1	x2	y1	y2	mean	sd		y1	y2	Mean	sd		y1	y2	protein	y1/pc	y2/pc	mean	sd			2		2 3 2 4 2 0 0								day 1	day 3	day 5	day 7				day 1	day 3
1	C. pinnatifedum	control	0.08	0.1	0.0266667	0.0333333	0.079	0.0523333	0.0456667	0.662447	0.578059	0.0132489	0.0115612	0.0124051	0.00119343		2.64979	2.31224	2.48101	0.238686		2.64979	2.31224	61.125	0.0433503	0.037828	0.0405892	0.00390488					1	0.0132489	0.0115612	0.0124051	0.00119343		PBG 5	control	1.16	2.37	0.34	1.29		PBG 5	control	0.13	0.01
		diseased	0.082	0.1	0.0273333	0.0333333	0.079	0.0516667	0.0456667	0.654008	0.578059	0.0130802	0.0115612	0.0123207	0.00107409		2.61603	2.31224	2.46414	0.214817		2.61603	2.31224	58.15	0.0449877	0.0397633	0.0423755	0.00369419					2	0.0130802	0.0115612	0.0123207	0.00107409			diseased	1.79	3.36	1.89	1.3			diseased	0.05	0.1
																	0	0	0	0		0	0										3	0.00531646	0.00624473	0.00578059	0.000656386		C.pinnatifidum	control	2.46	1.61	1.09	1.56		C. pinnatifedum	control	0.22	0.39
2	PBG 5	control	0.174	0.163	0.058	0.0543333	0.079	0.021	0.0246667	0.265823	0.312236	0.00531646	0.00624473	0.00578059	0.000656386		1.06329	1.24895	1.15612	0.131277		1.06329	1.24895	59.1	0.0179914	0.0211327	0.0195621	0.00222127					4	0.00877637	0.00911392	0.00894515	0.000238686		C.pinnatifidum	diseased	2.48	3.51	2.9	3.28			diseased	0.24	0.02
		diseased	0.133	0.129	0.0443333	0.043	0.079	0.0346667	0.036	0.438819	0.455696	0.00877637	0.00911392	0.00894515	0.000238686		1.75527	1.82278	1.78903	0.0477372		1.75527	1.82278	52.2	0.0336259	0.0349192	0.0342726	0.000914505					5	0.0176371	0.0174684	0.0175527	0.000119343
																	0	0	0	0		0	0										6	0.00945148	0.00666667	0.00805907	0.00196916
Day 3																	0	0	0	0		0	0										7	0.0118987	0.0118143	0.0118565	5.96715e-05
1	C. pinnatifedum	control	0.028	0.03	0.00933333	0.01	0.079	0.0696667	0.069	0.881857	0.873418	0.0176371	0.0174684	0.0175527	0.000119343		3.52743	3.49367	3.51055	0.0238686		3.52743	3.49367	60.85	0.0579692	0.0574145	0.0576918	0.000392253					8	0.0171308	0.0164557	0.0167932	0.000477372
		diseased	0.125	0.158	0.0416667	0.0526667	0.079	0.0373333	0.0263333	0.472574	0.333333	0.00945148	0.00666667	0.00805907	0.00196916		1.8903	1.33333	1.61181	0.393832		1.8903	1.33333	58.575	0.0322714	0.0227628	0.0275171	0.00672354					9	0.0152743	0.0137553	0.0145148	0.00107409
																	0	0	0	0		0	0										10	0.00548523	0.00540084	0.00544304	5.96715e-05
2	PBG 5	control	0.096	0.097	0.032	0.0323333	0.079	0.047	0.0466667	0.594937	0.590717	0.0118987	0.0118143	0.0118565	5.96715e-05		2.37975	2.36287	2.37131	0.0119343		2.37975	2.36287	43.7	0.0544564	0.0540702	0.0542633	0.000273096					11	0.000759494	0.00261603	0.00168776	0.00131277
		diseased	0.034	0.042	0.0113333	0.014	0.079	0.0676667	0.065	0.85654	0.822785	0.0171308	0.0164557	0.0167932	0.000477372		3.42616	3.29114	3.35865	0.0954743		3.42616	3.29114	42.2	0.0811886	0.0779891	0.0795889	0.00226242					12	0.00978903	0.00911392	0.00945148	0.000477372
																	0	0	0	0		0	0										13	0.0167932	0.0160338	0.0164135	0.000537043
Day 5																	0	0	0	0		0	0										14	0.00759494	0.00801688	0.00780591	0.000298357
1	C. pinnatifedum	control	0.056	0.074	0.0186667	0.0246667	0.079	0.0603333	0.0543333	0.763713	0.687764	0.0152743	0.0137553	0.0145148	0.00107409		3.05485	2.75105	2.90295	0.214817		3.05485	2.75105	74.4	0.0410598	0.0369765	0.0390182	0.00288733					15	0.00666667	0.00632911	0.00649789	0.000238686
		diseased	0.172	0.173	0.0573333	0.0576667	0.079	0.0216667	0.0213333	0.274262	0.270042	0.00548523	0.00540084	0.00544304	5.96715e-05		1.09705	1.08017	1.08861	0.0119343		1.09705	1.08017	84.05	0.0130523	0.0128515	0.0129519	0.00014199					16	0.00658228	0.00632911	0.0064557	0.000179014
																	0	0	0	0		0	0
2	PBG 5	control	0.228	0.206	0.076	0.0686667	0.079	0.003	0.0103333	0.0379747	0.130802	0.000759494	0.00261603	0.00168776	0.00131277		0.151899	0.523207	0.337553	0.262554		0.151899	0.523207	44.025	0.00345028	0.0118843	0.0076673	0.00596376
		diseased	0.121	0.129	0.0403333	0.043	0.079	0.0386667	0.036	0.489451	0.455696	0.00978903	0.00911392	0.00945148	0.000477372		1.95781	1.82278	1.8903	0.0954743		1.95781	1.82278	46.625	0.0419905	0.0390946	0.0405425	0.00204771
																	0	0	0	0		0	0
Day7																	0	0	0	0		0	0
1	C. pinnatifedum	control	0.038	0.047	0.0126667	0.0156667	0.079	0.0663333	0.0633333	0.839662	0.801688	0.0167932	0.0160338	0.0164135	0.000537043		3.35865	3.20675	3.2827	0.107409		3.35865	3.20675	49.4	0.0679889	0.064914	0.0664514	0.00217426
		diseased	0.147	0.142	0.049	0.0473333	0.079	0.03	0.0316667	0.379747	0.400844	0.00759494	0.00801688	0.00780591	0.000298357		1.51899	1.60338	1.56118	0.0596715		1.51899	1.60338	48.5	0.0313193	0.0330593	0.0321893	0.00123034
																	0	0	0	0		0	0																2.48101	2.46414	0	1.15612	1.78903	0	0	3.51055		0
2	PBG 5	control	0.158	0.162	0.0526667	0.054	0.079	0.0263333	0.025	0.333333	0.316456	0.00666667	0.00632911	0.00649789	0.000238686		1.33333	1.26582	1.29958	0.0477372		1.33333	1.26582	35.15	0.0379327	0.036012	0.0369723	0.0013581																		1.61181
		diseased	0.159	0.162	0.053	0.054	0.079	0.026	0.025	0.329114	0.316456	0.00658228	0.00632911	0.0064557	0.000179014		1.31646	1.26582	1.29114	0.0358029		1.31646	1.26582	82.15	0.016025	0.0154087	0.0157169	0.000435823																		2.37131
																	0	0																												3.35865
																																														2.90295
		GPOx(420nm)																																												1.08861
																								GPOx																						0.337553
Day 1			o.d1	o.d2	o.d1/3	o.d2/3	r1	r2	mean	sd		r1	r1	protein	r1/pc	r2/pc	mean	sd					2		2 3 2 4 2 0 0								day 1	day 3	day 5	day 7				day 1	day 3	day 5	day 7			1.8903
1	C. pinnatifedum	control	0.009	0.022	0.003	0.00733333	0.3	0.733333	0.516667	0.306413		0.3	0.733333	61.125	0.00490798	0.0119973	0.00845262	0.00501289							1	0.3	0.733333	0.516667	0.306413		PBG 5	control	0.683333	1.35	0.566667	0.25		PBG 5	control	0.259272	0.164992	0.188562	0.117851			3.2827
		diseased	0.005	0.011	0.00166667	0.00366667	0.166667	0.366667	0.266667	0.141421		0.166667	0.366667	58.15	0.00286615	0.00630553	0.00458584	0.00243201							2	0.166667	0.366667	0.266667	0.141421			diseased	0.65	2.31667	3.333	0.433333			diseased	0.0235702	0.0235702	0.047	0.141421			1.56118
																									3	0.5	0.866667	0.683333	0.259272		C.pinnatifidum	control	0.516667	0.983333	0.483333	0.483333		C.pinnatifidum	control	0.306413	0.0235702	0.164992	0.117851			1.29958
2	PBG 5	control	0.015	0.026	0.005	0.00866667	0.5	0.866667	0.683333	0.259272		0.5	0.866667	59.1	0.00846024	0.0146644	0.0115623	0.00438701							4	0.666667	0.633333	0.65	0.0235702		C.pinnatifidum	diseased	0.266667	1.6	0.683333	0.55			diseased	0.141421	0.141421	0.164992	0.117851			1.29114
		diseased	0.02	0.019	0.00666667	0.00633333	0.666667	0.633333	0.65	0.0235702		0.666667	0.633333	52.2	0.0127714	0.0121328	0.0124521	0.000451537							5	1	0.966667	0.983333	0.0235702
																									6	1.7	1.5	1.6	0.141421
Day 3																									7	1.23333	1.46667	1.35	0.164992
1	C. pinnatifedum	control	0.03	0.029	0.01	0.00966667	1	0.966667	0.983333	0.0235702		1	0.966667	60.85	0.0164339	0.0158861	0.01616	0.00038735							8	2.33333	2.3	2.31667	0.0235702
		diseased	0.051	0.045	0.017	0.015	1.7	1.5	1.6	0.141421		1.7	1.5	58.575	0.0290226	0.0256082	0.0273154	0.00241436							9	0.6	0.366667	0.483333	0.164992
																									10	0.566667	0.8	0.683333	0.164992
2	PBG 5	control	0.037	0.044	0.0123333	0.0146667	1.23333	1.46667	1.35	0.164992		1.23333	1.46667	43.7	0.0282227	0.0335622	0.0308924	0.00377555							11	0.7	0.433333	0.566667	0.188562
		diseased	0.07	0.069	0.0233333	0.023	2.33333	2.3	2.31667	0.0235702		2.33333	2.3	42.2	0.0552923	0.0545024	0.0548973	0.000558536							12	3.66667	0.666667	2.16667	2.12132
																									13	0.4	0.566667	0.483333	0.117851
Day 5																									14	0.466667	0.633333	0.55	0.117851
1	C. pinnatifedum	control	0.018	0.011	0.006	0.00366667	0.6	0.366667	0.483333	0.164992		0.6	0.366667	74.4	0.00806452	0.00492832	0.00649642	0.00221763							15	0.166667	0.333333	0.25	0.117851
		diseased	0.017	0.024	0.00566667	0.008	0.566667	0.8	0.683333	0.164992		0.566667	0.8	84.05	0.00674202	0.00951814	0.00813008	0.00196302							16	0.333333	0.533333	0.433333	0.141421
2	PBG 5	control	0.021	0.013	0.007	0.00433333	0.7	0.433333	0.566667	0.188562		0.7	0.433333	44.025	0.0159001	0.00984289	0.0128715	0.00428306
		diseased	0.11	0.09	0.0366667	0.03	3.66667	3	3.33333	0.471405		3.66667	3	46.625	0.0786416	0.0643432	0.0714924	0.0101106
Day7
1	C. pinnatifedum	control	0.012	0.017	0.004	0.00566667	0.4	0.566667	0.483333	0.117851		0.4	0.566667	49.4	0.00809717	0.011471	0.00978408	0.00238565
		diseased	0.014	0.019	0.00466667	0.00633333	0.466667	0.633333	0.55	0.117851		0.466667	0.633333	48.5	0.00962199	0.0130584	0.0113402	0.00242992
2	PBG 5	control	0.005	0.01	0.00166667	0.00333333	0.166667	0.333333	0.25	0.117851		0.166667	0.333333	35.15	0.00474158	0.00948317	0.00711238	0.00335281
		diseased	0.01	0.016	0.00333333	0.00533333	0.333333	0.533333	0.433333	0.141421		0.333333	0.533333	82.15	0.00405762	0.00649219	0.0052749	0.0017215
		PPO(410nm)																						PPO
																							2		2 3 2 4 2 0 0								day 1	day 3	day 5	day 7				day 1	day 3	day 5	day 7			day 1	day 3	day 5	day 7
Day 1			o.d1	o.d2	o.d1/3	o.d2/3	r1	r2	mean	sd		r1	r2	protein	r1/pc	r2/pc	mean	sd							1	0.233333	0.133333	0.183333	0.0707107		PBG 5	control	0.183333	0.11	0.143333	0.186667		PBG 5	control	0.0707107	0.014	0.0612826	0.00942809	PBG 5	control	0.023	0.014	0.03	0.009
1	C. pinnatifedum	control	0.035	0.02	0.0116667	0.00666667	0.233333	0.133333	0.183333	0.0707107		0.233333	0.133333	49.25	0.00473773	0.00270728	0.0037225	0.00143575							2	0.3	0.346667	0.323333	0.0329983			diseased	0.323333	0.12	0.16	0.19			diseased	0.0329983	0	0.0659966	0.00471405		diseased	0.033	0	0.03	0.005
		diseased	0.045	0.052	0.015	0.0173333	0.3	0.346667	0.323333	0.0329983		0.3	0.346667	60.1	0.00499168	0.00576816	0.00537992	0.000549057							3	0.06	0.02	0.04	0.0282843		C.pinnatifidum	control	0.04	0.0566667	0.0566667	0.067		C. pinnatifedum	control	0.0282843	0.0141421	0.014142	0.019	C. pinnatifedum	control	0.015	0.006	0.003	0.019
																									4	0.106667	0.0533333	0.08	0.0377124			diseased	0.08	0.09	0.07	0.106667			diseased	0.0377124	0.0329983	0.0424264	0.0188562		diseased	0.011	0.004	0.003	0.019
2	PBG 5	control	0.009	0.003	0.003	0.001	0.06	0.02	0.04	0.0282843		0.06	0.02	67.65	0.000886918	0.000295639	0.000591279	0.000418097							5	0.04	0.12	0.08	0.0565685
		diseased	0.016	0.008	0.00533333	0.00266667	0.106667	0.0533333	0.08	0.0377124		0.106667	0.0533333	49.05	0.00217465	0.00108733	0.00163099	0.000768855							6	0.12	0.12	0.12	0				1	3	5	7
																									7	0.0466667	0.0666667	0.0566667	0.0141421
Day 3																									8	0.0666667	0.113333	0.09	0.0329983
1	C. pinnatifedum	control	0.015	0.018	0.005	0.006	0.1	0.12	0.11	0.0141421		0.1	0.12	55.825	0.00179131	0.00214957	0.00197044	0.00025333							9	0.1	0.186667	0.143333	0.0612826
		diseased	0.018	0.018	0.006	0.006	0.12	0.12	0.12	0		0.12	0.12	45.425	0.00264172	0.00264172	0.00264172	0							10	0.113333	0.206667	0.16	0.0659966
																									11	0.04	0.1	0.07	0.0424264
2	PBG 5	control	0.007	0.01	0.00233333	0.00333333	0.0466667	0.0666667	0.0566667	0.0141421		0.0466667	0.0666667	58.55	0.00079704	0.00113863	0.000967834	0.000241539							12	0.0466667	0.0666667	0.0566667	0.0141421
		diseased	0.01	0.017	0.00333333	0.00566667	0.0666667	0.113333	0.09	0.0329983		0.0666667	0.113333	55.075	0.00121047	0.0020578	0.00163414	0.000599152							13	0.18	0.193333	0.186667	0.00942809
																									14	0.193333	0.186667	0.19	0.00471405
Day 5																									15	0.0133333	0.08	0.0466667	0.0471405
1	C. pinnatifedum	control	0.015	0.028	0.005	0.00933333	0.1	0.186667	0.143333	0.0612826		0.1	0.186667	67.925	0.00147221	0.00274813	0.00211017	0.00090221							16	0.0933333	0.12	0.106667	0.0188562
		diseased	0.017	0.031	0.00566667	0.0103333	0.113333	0.206667	0.16	0.0659966		0.113333	0.206667	89.35	0.00126842	0.002313	0.00179071	0.00073863
2	PBG 5	control	0.006	0.015	0.002	0.005	0.04	0.1	0.07	0.0424264		0.04	0.1	37.75	0.0010596	0.00264901	0.0018543	0.00112388
		diseased	0.007	0.01	0.00233333	0.00333333	0.0466667	0.0666667	0.0566667	0.0141421		0.0466667	0.0666667	54.05	0.000863398	0.00123343	0.00104841	0.000261649
Day7
1	C. pinnatifedum	control	0.027	0.029	0.009	0.00966667	0.18	0.193333	0.186667	0.00942809		0.18	0.193333	79.2	0.00227273	0.00244108	0.0023569	0.000119042
		diseased	0.029	0.028	0.00966667	0.00933333	0.193333	0.186667	0.19	0.00471405		0.193333	0.186667	84.325	0.00229272	0.00221366	0.00225319	5.59033e-05
2	PBG 5	control	0.008	0.012	0.00266667	0.004	0.0533333	0.08	0.0666667	0.0188562		0.053333	0.08	52.725	0.00101153	0.00151731	0.00126442	0.000357637
		diseased	0.014	0.018	0.00466667	0.006	0.0933333	0.12	0.106667	0.0188562		0.0933333	0.12	53.1	0.00175769	0.00225989	0.00200879	0.000355107
		PAL(nm)																						PAL
																							2		2 3 2 4 2 0 0								1	3	5	7				day 1	day 3	day 5	day 7
Day 1			o.d1	o.d2	o.d1/3	o.d2/3	r1	r2	Mean	sd		r1	r2	protein	r1/pc	r2/pc	mean	sd							1	25.2392	25.2697	25.2545	0.0215998		PBG 5	uninoculated	25.25	26.0907	25.6019	25.1399		PBG 5	control	0	0.0161998	0.0161998	0.0107999
1	C. pinnatifedum	control	3.305	3.309	1.10167	1.103	25.2392	25.2697	25.2545	0.0215998		25.2392	25.2697	49.25	0.512471	0.513091	0.512781	0.000438574							2	25.117	25.0941	25.1055	0.0161998		PBG 5	inoculated	25.25	26.1709	25.6859	25.3652			diseased	0	0.0107999	0.0161998	0.0161998
		diseased	3.289	3.286	1.09633	1.09533	25.117	25.0941	25.1055	0.0161998		25.117	25.0941	60.1	0.41792	0.417539	0.417729	0.000269548							3	25.25	25.25	25.25	0		C.pinnatifidum	uninoculated	25.2545	25.327	25.8463	26.0945		C. pinnatifedum	control	0.0215998	0.0161998	0.0161998	0.0107999
																									4	3.08521	3.03939	3.0623	0.0323996		C.pinnatifidum	inoculated	25.1055	25.3843	26.0372	26.5985			diseased	0.0161998	0.0215998	0.0269997	0.0107999
2	PBG 5	control	0.382	0.384	0.127333	0.128	2.91721	2.93248	2.92484	0.0107999		2.91721	2.93248	67.65	0.043122	0.0433478	0.0432349	0.000159643							5	25.3385	25.3155	25.327	0.0161998
		diseased	0.404	0.398	0.134667	0.132667	3.08521	3.03939	3.0623	0.0323996		3.08521	3.03939	49.05	0.0628994	0.0619652	0.0624323	0.000660543							6	25.3996	25.369	25.3843	0.0215998
																									7	26.1021	26.0792	26.0907	0.0161998
Day 3																									8	26.1785	26.1632	26.1709	0.0107999
1	C. pinnatifedum	control	3.318	3.315	1.106	1.105	25.3385	25.3155	25.327	0.0161998		25.3385	25.3155	55.825	0.453891	0.453481	0.453686	0.000290189							9	25.8578	25.8348	25.8463	0.0161998
		diseased	3.326	3.322	1.10867	1.10733	25.3996	25.369	25.3843	0.0215998		25.3996	25.369	45.425	0.559154	0.558481	0.558817	0.000475504							10	26.0181	26.0563	26.0372	0.0269997
																									11	25.5905	25.6134	25.6019	0.0161998
2	PBG 5	control	3.418	3.415	1.13933	1.13833	26.1021	26.0792	26.0907	0.0161998		26.1021	26.0792	58.55	0.445809	0.445418	0.445614	0.000276683							12	25.6974	25.6745	25.6859	0.0161998
		diseased	3.428	3.426	1.14267	1.142	26.1785	26.1632	26.1709	0.0107999		26.1785	26.1632	55.075	0.475324	0.475047	0.475186	0.000196094							13	26.1021	26.0869	26.0945	0.0107999
																									14	26.5909	26.6061	26.5985	0.0107999
Day 5																									15	25.1475	25.1323	25.1399	0.0107999
1	C. pinnatifedum	control	3.386	3.383	1.12867	1.12767	25.8578	25.8348	25.8463	0.0161998		25.8578	25.8348	67.925	0.380681	0.380344	0.380512	0.000238496							16	25.3537	25.3766	25.3652	0.0161998
		diseased	3.407	3.412	1.13567	1.13733	26.0181	26.0563	26.0372	0.0269997		26.0181	26.0563	89.35	0.291193	0.291621	0.291407	0.000302179
2	PBG 5	control	3.351	3.354	1.117	1.118	25.5905	25.6134	25.6019	0.0161998		25.5905	25.6134	37.75	0.677893	0.6785	0.678197	0.000429134
		diseased	3.365	3.362	1.12167	1.12067	25.6974	25.6745	25.6859	0.0161998		25.6974	25.6745	54.05	0.475437	0.475013	0.475225	0.000299719
Day7
1	C. pinnatifedum	control	3.418	3.416	1.13933	1.13867	26.1021	26.0869	26.0945	0.0107999		26.1021	26.0869	79.2	0.329572	0.329379	0.329476	0.000136362
		diseased	3.482	3.484	1.16067	1.16133	26.5909	26.6061	26.5985	0.0107999		26.5909	26.6061	84.325	0.315338	0.315519	0.315429	0.000128074
2	PBG 5	control	3.293	3.291	1.09767	1.097	25.1475	25.1323	25.1399	0.0107999		25.1475	25.1323	52.725	0.476957	0.476667	0.476812	0.000204834
		diseased	3.32	3.323	1.10667	1.10767	25.3537	25.3766	25.3652	0.0161998		25.3537	25.3766	53.1	0.477471	0.477903	0.477687	0.000305081
[truncated: 8 more columns]

## Sheet: Sheet2
			Total Protein content ( CAT & AAPx)				(mg/g fw)
Day 1				second trial									1st trial								Total Pr (first trial)(CAT & APX)								Total Pr (second trial)(CAT & APX)									day 1	day 3	day 5	day 7				day 1	day 3	day 5	day 7
			o.d1	o.d2	r1	r2	mean	s.d					o.d1	o.d2	r1	r2	mean	s.d		2		2 3 2 4 20 0						2		2 3 2 4 2 0 0						PBG	control	17.1	24.1	39.625	41		PBG	control	0.141421	0.0707107	0.176777	0.0707107
1	PBG	control	0.981	0.979	49.05	48.95	49	0.0707107					0.344	0.34	17.2	17	17.1	0.141421				1	17.2	17	17.1	0.141421				1	49.05	48.95	49	0.0707107			diseased	18.6	31.75	26.15	27.55			diseased	0.0707107	0.0707107	0	0
		diseased	0.965	0.967	48.25	48.35	48.3	0.0707107					0.373	0.371	18.65	18.55	18.6	0.0707107				2	18.65	18.55	18.6	0.0707107				2	48.25	48.35	48.3	0.0707107		C. pinnatifedum	control	43	25.975	42.55	51.425		C. pinnatifedum	control	0.0707107	0.0353553	0.0707107	0.0353553
					0	0	0	0							0	0						3	43.05	42.95	43	0.0707107				3	53.9	54.1	54	0.141421			diseased	26.75	25.075	30.95	65.175			diseased	0.0707107	0.106066	0.212132	0.106066
2	C. pinnatifedum	control	1.078	1.082	53.9	54.1	54	0.141421					0.861	0.859	43.05	42.95	43	0.0707107				4	26.8	26.7	26.75	0.0707107				4	45.7	45.6	45.65	0.0707107
		diseased	0.914	0.912	45.7	45.6	45.65	0.0707107					0.536	0.534	26.8	26.7	26.75	0.0707107				5	24.15	24.05	24.1	0.0707107				5	26.65	26.8	26.725	0.106066				day 1	day 3	day 5	day 7				day 1	day 3	day 5	day 7
					0	0	0	0							0	0						6	31.8	31.7	31.75	0.0707107				6	44.45	44.3	44.375	0.106066		PBG	control	49	26.725	40.65	38.325		PBG	control	0.0707107	0.106066	0.0707107	0.176777
Day 3					0	0	0	0							0	0						7	26	25.95	25.975	0.0353553				7	60.3	60.45	60.375	0.106066			diseased	48.3	44.375	44.225	39.9			diseased	0.0707107	0.106066	0.176777	0.0707107
					0	0	0	0							0	0						8	25.15	25	25.075	0.106066				8	59.2	59.1	59.15	0.0707107		C. pinnatifedum	control	54	60.375	59.3	50.975		C. pinnatifedum	control	0.141421	0.106066	0.212132	0.106066
1	PBG	control	0.533	0.536	26.65	26.8	26.725	0.106066					0.483	0.481	24.15	24.05	24.1	0.0707107				9	39.75	39.5	39.625	0.176777				9	40.6	40.7	40.65	0.0707107			diseased	45.65	59.15	62.625	63.475			diseased	0.0707107	0.0707107	0.106066	0.106066
		diseased	0.889	0.886	44.45	44.3	44.375	0.106066					0.636	0.634	31.8	31.7	31.75	0.0707107				10	26.15	26.15	26.15	0				10	44.35	44.1	44.225	0.176777
					0	0	0	0							0	0						11	42.6	42.5	42.55	0.0707107				11	59.45	59.15	59.3	0.212132
2	C. pinnatifedum	control	1.206	1.209	60.3	60.45	60.375	0.106066					0.52	0.519	26	25.95	25.975	0.0353553				12	31.1	30.8	30.95	0.212132				12	62.55	62.7	62.625	0.106066
		diseased	1.184	1.182	59.2	59.1	59.15	0.0707107					0.503	0.5	25.15	25	25.075	0.106066				13	41.05	40.95	41	0.0707107				13	38.45	38.2	38.325	0.176777
					0	0	0	0							0	0						14	27.55	27.55	27.55	0				14	39.85	39.95	39.9	0.0707107
Day 5					0	0	0	0							0	0						15	51.45	51.4	51.425	0.0353553				15	50.9	51.05	50.975	0.106066
					0	0	0	0							0	0						16	65.25	65.1	65.175	0.106066				16	63.4	63.55	63.475	0.106066
1	PBG	control	0.812	0.814	40.6	40.7	40.65	0.0707107					0.795	0.79	39.75	39.5	39.625	0.176777
		diseased	0.887	0.882	44.35	44.1	44.225	0.176777					0.523	0.523	26.15	26.15	26.15	0
					0	0	0	0							0	0
2	C. pinnatifedum	control	1.189	1.183	59.45	59.15	59.3	0.212132					0.852	0.85	42.6	42.5	42.55	0.0707107
		diseased	1.251	1.254	62.55	62.7	62.625	0.106066					0.622	0.616	31.1	30.8	30.95	0.212132
					0	0	0	0							0	0	0	0
Day 7					0	0	0	0							0	0	0	0
					0	0	0	0							0	0	0	0
1	PBG	control	0.769	0.764	38.45	38.2	38.325	0.176777					0.821	0.819	41.05	40.95	41	0.0707107
		diseased	0.797	0.799	39.85	39.95	39.9	0.0707107					0.551	0.551	27.55	27.55	27.55	0
					0	0	0	0							0	0	0	0
2	C. pinnatifedum	control	1.018	1.021	50.9	51.05	50.975	0.106066					1.029	1.028	51.45	51.4	51.425	0.0353553
		diseased	1.268	1.271	63.4	63.55	63.475	0.106066					1.305	1.302	65.25	65.1	65.175	0.106066
			(SOD & GPOx)
																					SOD & GPOX)								SOD & GPOX									day 1	day 3	day 5	day 7				day 1	day 3	day 5	day 7
Day 1																				2		2 3 2 4 2 0 0						2		2 3 2 4 2 0 0						PBG	control	10.8	21.15	33.375	19.225		PBG	control	0	0.070711	0.0353553	0.106066
																						1	20.25	20.25	20.25	0				1	59.05	59.15	59.1	0.0707107			diseased	20.25	23.35	44.725	48.675			diseased	0.0707107	0.141421	0.0353553	0.106066
1	PBG	control	1.181	1.183	59.05	59.15	59.1	0.0707107			0.405	0.405	20.25	20.25	20.25	0						2	10.75	10.85	10.8	0.0707107				2	52.3	52.1	52.2	0.141421		C. pinnatifedum	control	21.75	28.76	21.15	21.63		C. pinnatifedum	control	0.0707107	0.0707107	0.0707107	0.282843
		diseased	1.046	1.042	52.3	52.1	52.2	0.141421			0.215	0.217	10.75	10.85	10.8	0.0707107						3	23.5	23.6	23.55	0.0707107				3	61.05	61.2	61.125	0.106066			diseased	23.55	32.15	23.05	38.25			diseased	0.0707107	0.106066	0.0707107	0.0353553
					0	0							0	0	0	0						4	21.8	21.7	21.75	0.0707107				4	58.2	58.1	58.15	0.0707107
2	C. pinnatifedum	control	1.221	1.224	61.05	61.2	61.125	0.106066			0.47	0.472	23.5	23.6	23.55	0.0707107						5	23.45	23.25	23.35	0.141421				5	43.6	43.8	43.7	0.141421				day 1	day 3	day 5	day 7				day 1	day 3	day 5	day 7
		diseased	1.164	1.162	58.2	58.1	58.15	0.0707107			0.436	0.434	21.8	21.7	21.75	0.0707107						6	21.2	21.1	21.15	0.0707107				6	42.35	42.05	42.2	0.212132		PBG	control	52.2	42.2	44.025	35.15		PBG	control	0.0707107	0.141421	0.0353553	0.070711
					0	0							0	0	0	0						7	32.1	32.2	32.15	0.0707107				7	60.8	60.9	60.85	0.0707107			diseased	59.1	43.7	46.625	82.15			diseased	0.141421	0.212132	0.106066	0.141421
Day 3					0	0							0	0	0	0						8	28.85	28.7	28.775	0.106066				8	58.5	58.65	58.575	0.106066		C. pinnatifedum	control	58.15	58.58	74.4	48.5		C. pinnatifedum	control	0.070711	0.0707107	0.0707107	0.0707107
					0	0							0	0	0	0						9	33.4	33.35	33.375	0.0353553				9	44.05	44	44.025	0.0353553			diseased	61.125	60.85	84.05	49.4			diseased	0.106066	0.106066	0.0707107	0.0707107
1	PBG	control	0.872	0.876	43.6	43.8	43.7	0.141421			0.469	0.465	23.45	23.25	23.35	0.141421						10	44.75	44.7	44.725	0.0353553				10	46.7	46.55	46.625	0.106066
		diseased	0.847	0.841	42.35	42.05	42.2	0.212132			0.424	0.422	21.2	21.1	21.15	0.0707107						11	21.2	21.1	21.15	0.0707107				11	74.45	74.35	74.4	0.0707107
					0	0							0	0	0	0						12	23.1	23	23.05	0.0707107				12	84	84.1	84.05	0.0707107
2	C. pinnatifedum	control	1.216	1.218	60.8	60.9	60.85	0.0707107			0.642	0.644	32.1	32.2	32.15	0.0707107						13	19.3	19.15	19.225	0.106066				13	35.25	35.05	35.15	0.141421
		diseased	1.17	1.173	58.5	58.65	58.575	0.106066			0.577	0.574	28.85	28.7	28.775	0.106066						14	48.75	48.6	48.675	0.106066				14	82.2	82.1	82.15	0.0707107
					0	0							0	0	0	0						15	38.45	38.05	38.25	0.282843				15	49.45	49.35	49.4	0.0707107
Day 5					0	0							0	0	0	0						16	21.65	21.6	21.625	0.0353553				16	48.45	48.55	48.5	0.0707107
					0	0							0	0	0	0
1	PBG	control	0.881	0.88	44.05	44	44.025	0.0353553			0.668	0.667	33.4	33.35	33.375	0.0353553
		diseased	0.934	0.931	46.7	46.55	46.625	0.106066			0.895	0.894	44.75	44.7	44.725	0.0353553
					0	0							0	0	0	0
2	C. pinnatifedum	control	1.489	1.487	74.45	74.35	74.4	0.0707107			0.424	0.422	21.2	21.1	21.15	0.0707107
		diseased	1.68	1.682	84	84.1	84.05	0.0707107			0.462	0.46	23.1	23	23.05	0.0707107
					0	0							0	0	0	0
Day 7					0	0							0	0	0	0
					0	0							0	0	0	0
1	PBG	control	0.705	0.701	35.25	35.05	35.15	0.141421			0.386	0.383	19.3	19.15	19.225	0.106066
		diseased	1.644	1.642	82.2	82.1	82.15	0.0707107			0.975	0.972	48.75	48.6	48.675	0.106066
					0	0							0	0	0	0
2	C. pinnatifedum	control	0.989	0.987	49.45	49.35	49.4	0.0707107			0.769	0.761	38.45	38.05	38.25	0.282843
		diseased	0.969	0.971	48.45	48.55	48.5	0.0707107			0.433	0.432	21.65	21.6	21.625	0.0353553
			(PAL & PPO)
Day 1
																					PPO & PAL								PPO & PAL
1	PBG	control	1.359	1.347	67.95	67.35	67.65	0.424264			0.238	0.235	11.9	11.75	11.825	0.106066				2		2 3 2 4 2 0 0						2		2 3 2 4 2 0 0								day 1	day 3	day 5	day 7				day 1	day 3	day 5	day 7
		diseased	0.982	0.98	49.1	49	49.05	0.0707107			0.222	0.219	11.1	10.95	11.025	0.106066						1	11.9	11.75	11.825	0.106066				1	67.95	67.35	67.65	0.424264		PBG	control	11.025	19.1	15.45	37.23		PBG	control	0.106066	0.0707107	0.0707107	0.0707107
					0	0		0					0	0								2	11.1	10.95	11.025	0.106066				2	49.1	49	49.05	0.0707107			diseased	11.825	20.2	47.325	44.55			diseased	0.106066	0.0707107	0.106066	0.0353553
2	C. pinnatifedum	control	0.981	0.989	49.05	49.45	49.25	0.282843			0.213	0.213	10.65	10.65	10.65	0						3	10.65	10.65	10.65	0				3	49.05	49.45	49.25	0.282843		C. pinnatifedum	control	10.65	18.58	18.325	26.1		C. pinnatifedum	control	0	0.0707107	0.0353553	0.141421
		diseased	1.2	1.204	60	60.2	60.1	0.141421			0.481	0.48	24.05	24	24.025	0.0353553						4	24.05	24	24.025	0.0353553				4	60	60.2	60.1	0.141421			diseased	24.025	27.6	33.45	41.4			diseased	0.0353553	0.106066	0	0.0707107
					0	0		0					0	0								5	20.25	20.15	20.2	0.0707107				5	61.15	55.95	58.55	3.67696
Day 3					0	0		0					0	0								6	19.05	19.15	19.1	0.0707107				6	55.15	55	55.075	0.106066				day 1	day 3	day 5	day 7				day 1	day 3	day 5	day 7
					0	0		0					0	0								7	27.65	27.55	27.6	0.0707107				7	55.9	55.75	55.825	0.106066		PBG	control	49.05	55.08	37.75	52.725		PBG	control	0.0707107	3.67696	0.0707107	0.176777
1	PBG	control	1.223	1.119	61.15	55.95	58.55	3.67696			0.405	0.403	20.25	20.15	20.2	0.0707107						8	18.65	18.5	18.575	0.106066				8	45.4	45.45	45.425	0.0353553			diseased	67.65	58.55	54.05	53.1			diseased	0.424264	0.106066	0.0707107	0.141421
		diseased	1.103	1.1	55.15	55	55.075	0.106066			0.381	0.383	19.05	19.15	19.1	0.0707107						9	15.5	15.4	15.45	0.0707107				9	37.7	37.8	37.75	0.0707107		C. pinnatifedum	control	49.25	45.43	67.925	79.2		C. pinnatifedum	control	0.282843	0.0353553	0.0353553	0.141421
					0	0		0					0	0								10	47.4	47.25	47.325	0.106066				10	54.1	54	54.05	0.0707107			diseased	60.1	55.825	89.35	84.325			diseased	0.141421	0.106066	0.0707107	0.176777
2	C. pinnatifedum	control	1.118	1.115	55.9	55.75	55.825	0.106066			0.553	0.551	27.65	27.55	27.6	0.0707107						11	18.35	18.3	18.325	0.0353553				11	67.95	67.9	67.925	0.0353553
		diseased	0.908	0.909	45.4	45.45	45.425	0.0353553			0.373	0.37	18.65	18.5	18.575	0.106066						12	33.45	33.45	33.45	0				12	89.4	89.3	89.35	0.0707107
					0	0		0					0	0								13	44.5	44.6	44.55	0.0707107				13	52.6	52.85	52.725	0.176777
Day 5					0	0		0					0	0								14	37.25	37.2	37.225	0.0353553				14	53	53.2	53.1	0.141421
					0	0		0					0	0								15	26.2	26	26.1	0.141421				15	79.1	79.3	79.2	0.141421
1	PBG	control	0.754	0.756	37.7	37.8	37.75	0.0707107			0.31	0.308	15.5	15.4	15.45	0.0707107						16	41.45	41.35	41.4	0.0707107				16	84.45	84.2	84.325	0.176777
		diseased	1.082	1.08	54.1	54	54.05	0.0707107			0.948	0.945	47.4	47.25	47.325	0.106066
					0	0		0					0	0
2	C. pinnatifedum	control	1.359	1.358	67.95	67.9	67.925	0.0353553			0.367	0.366	18.35	18.3	18.325	0.0353553
		diseased	1.788	1.786	89.4	89.3	89.35	0.0707107			0.669	0.669	33.45	33.45	33.45	0
					0	0							0	0
Day 7					0	0							0	0
					0	0							0	0
1	PBG	control	1.052	1.057	52.6	52.85	52.725	0.176777			0.89	0.892	44.5	44.6	44.55	0.0707107
		diseased	1.06	1.064	53	53.2	53.1	0.141421			0.745	0.744	37.25	37.2	37.225	0.0353553
					0	0							0	0
2	C. pinnatifedum	control	1.582	1.586	79.1	79.3	79.2	0.141421			0.524	0.52	26.2	26	26.1	0.141421
		diseased	1.689	1.684	84.45	84.2	84.325	0.176777			0.829	0.827	41.45	41.35	41.4	0.0707107

## Sheet: Sheet3
		MDA content
	2		2 3 2 4 2 0 0	R1	R2	R3	Mean	SD				day 1	day3	day5	day7
			1	0.002262	0.002236	0.00221	0.002236	3.67696e-05		PBG	control	2.236	4.017	3.588	3.939
			2	0.00286	0.002899	0.002938	0.002899	5.51543e-05			diseased	2.899	4.121	3.861	4.589
			3	0.006552	0.006565	0.006578	0.006565	1.83848e-05		C. pinnatifedum	control	3.731	4.199	4.914	6.76
			4	0.003744	0.003731	0.003718	0.003731	1.83848e-05			diseased	6.565	5.681	6.851	14.001
			5	0.004056	0.004017	0.003978	0.004017	5.51543e-05
			6	0.004134	0.004121	0.004108	0.004121	1.83848e-05				day 1	day3	day5	day7
			7	0.00572	0.005681	0.005642	0.005681	5.51543e-05		PBG	control	0.04	0.06	0	0.17
			8	0.00416	0.004199	0.004238	0.004199	5.51543e-05			diseased	0.06	0.02	0.09	0.06
			9	0.003588	0.003588	0.003588	0.003588	0		C. pinnatifedum	control	0.02	0.06	0.07	0.15
			10	0.003926	0.003861	0.003796	0.003861	9.19239e-05			diseased	0.02	0.06	0.09	0.02
			11	0.006916	0.006851	0.006786	0.006851	9.19239e-05
			12	0.004862	0.004914	0.004966	0.004914	7.35391e-05
			13	0.00455	0.004589	0.004628	0.004589	5.51543e-05
			14	0.003822	0.003939	0.004056	0.003939	0.000165463
			15	0.013988	0.014001	0.014014	0.014001	1.83848e-05
			16	0.006864	0.00676	0.006656	0.00676	0.000147078
			(Ascorbic Acid)
	2		2 3 2 4 2 0 0	R1	R2	R3	Mean	SD				day 1	day3	day5	day7
			1	0.005265	0.00533	0.005395	0.00533	9.19239e-05		PBG	control	5.33	4.16	7.93	6.86
			2	0.006565	0.0066625	0.00676	0.0066625	0.000137886			diseased	6.66	28.9	20.9	15.2
			3	0.006435	0.00637	0.006305	0.00637	9.19239e-05		C.pinnatifidum	control	6.37	6.76	5.62	6.21
			4	0.01924	0.019175	0.01911	0.019175	9.19239e-05		C.pinnatifidum	diseased	19.2	15.4	12.6	9.17
			5	0.004095	0.00416	0.004225	0.00416	9.19239e-05
			6	0.028925	0.02899	0.029055	0.02899	9.19239e-05				day 1	day3	day5	day7
			7	0.00663	0.00676	0.00689	0.00676	0.000183848		PBG	control	0.092	0.092	0.092	0.322
			8	0.01534	0.0154375	0.015535	0.0154375	0.000137886			diseased	0.138	0.092	0.046	0.322
			9	0.007865	0.00793	0.007995	0.00793	9.19239e-05		C. pinnatifedum	control	0.092	0.184	0.138	0.138
			10	0.02093	0.0208975	0.020865	0.0208975	4.59619e-05			diseased	0.092	0.138	0.276	0.092
			11	0.00572	0.0056225	0.005525	0.0056225	0.000137886
			12	0.012415	0.01261	0.012805	0.01261	0.000275772
			13	0.00663	0.0068575	0.007085	0.0068575	0.000321734
			14	0.01495	0.0151775	0.015405	0.0151775	0.000321734
			15	0.006305	0.0062075	0.00611	0.0062075	0.000137886
			16	0.00923	0.009165	0.0091	0.009165	9.19239e-05
			Total phenolic content
	2		2 3 2 4 2 0 0	R1	R2	R3	Mean	SD							1	3	5	7
			1	1.01904	1.03448	1.04992	1.03448	0.0218355					PBG	uninoculated	0.97272	0.98816	0.386	0.5404
			2	0.98816	0.97272	0.95728	0.97272	0.0218355						inoculated	1.03448	1.04992	0.40144	0.54812
			3	3.21152	3.21924	3.22696	3.21924	0.0109177					C. pinnatifidum	uninoculated	3.21924	3.21924	3.36592	4.053
			4	3.38136	3.36592	3.35048	3.36592	0.0218355					C. pinnatifidum	inoculated	3.36592	3.36592	3.474	4.21512
			5	0.98816	0.98816	0.98816	0.98816	0
			6	1.03448	1.04992	1.06536	1.04992	0.0218355
			7	3.21152	3.21924	3.22696	3.21924	0.0109177
			8	3.38136	3.36592	3.35048	3.36592	0.0218355							day 1	day3	day5	day7
			9	0.41688	0.386	0.35512	0.386	0.0436709					PBG	control	0.0218355	0	0.0436709	0.0218355
			10	0.386	0.40144	0.41688	0.40144	0.0218355						diseased	0.0218355	0.0218355	0.0218355	0.0327532
			11	3.38136	3.36592	3.35048	3.36592	0.0218355					C. pinnatifedum	control	0.0109177	0.0109177	0.0218355	0.0327532
			12	3.50488	3.474	3.44312	3.474	0.0436709						diseased	0.0218355	0.0218355	0.0436709	0.0218355
			13	0.55584	0.5404	0.52496	0.5404	0.0218355
			14	0.52496	0.54812	0.57128	0.54812	0.0327532
			15	4.07616	4.053	4.02984	4.053	0.0327532
			16	4.19968	4.21512	4.23056	4.21512	0.0218355
			Glutathione assay
	2		2 3 2 4 2 0 0	R1	R2	R3	Mean	SD							1	3	5	7
			1	0.689	0.65	0.611	0.65	0.0551543					PBG	uninoculated	0.559	0.4355	0.47775	0.61425
			2	0.56225	0.559	0.55575	0.559	0.00459619						inoculated	0.65	0.628875	0.65325	0.70525
			3	0.38675	0.385125	0.3835	0.385125	0.0022981					C. pinnatifidum	uninoculated	0.385125	0.54275	0.482625	0.742625
			4	0.4225	0.40625	0.39	0.40625	0.022981					C. pinnatifidum	inoculated	0.40625	0.947375	0.966875	0.97825
			5	0.63375	0.628875	0.624	0.628875	0.00689429
			6	0.42575	0.4355	0.44525	0.4355	0.0137886
			7	0.92625	0.947375	0.9685	0.947375	0.0298753
			8	0.5395	0.54275	0.546	0.54275	0.00459619							day 1	day3	day5	day7
			9	0.6435	0.65325	0.663	0.65325	0.0137886					PBG	control	0.004596	0.00689429	0.0137886	0.004596
			10	0.468	0.47775	0.4875	0.47775	0.0137886						diseased	0.0551543	0.0137886	0.0137886	0.00919239
			11	0.95225	0.966875	0.9815	0.966875	0.0206829					C. pinnatifedum	control	0.0022981	0.004596	0.0206829	0.0137886
			12	0.4615	0.482625	0.50375	0.482625	0.0298753						diseased	0.022981	0.0298753	0.0298753	0.0160867
			13	0.71175	0.70525	0.69875	0.70525	0.00919239
			14	0.6175	0.61425	0.611	0.61425	0.00459619
			15	0.9685	0.97825	0.988	0.97825	0.0137886
			16	0.73125	0.742625	0.754	0.742625	0.0160867
